# Supplementary material for: Charge-Shift Bonding Propensity in Halogen-Bonded BXY (B Is a Small Lewis Base H2O or NH3; X and Y Are Halogen Atoms) Complexes: An NBO/NRT/AIM Investigation
Source: MDPI journal article supplement (doi:10.3390/molecules28176212), 2023-08-24
Supplement: s1 [file s1]

## Supporting Information

# Charge-Shift Bonding Propensity in Halogen Bonded BXY (B Is a Small Lewis Base H<sub>2</sub>O or NH<sub>3</sub>; X and Y Are Halogen Atoms) Complexes: An NBO/NRT/AIM Investigation

Junjie Song <sup>1,2</sup>, Mengyang Wang <sup>1</sup>, Xiaocheng Xu <sup>2</sup>, Qinghao Shao <sup>1</sup>, Ying Zhao <sup>1</sup>,  
Guiqiu Zhang <sup>1,\*</sup> and Nan Sun <sup>1,\*</sup>

<sup>1</sup> Key Laboratory of Molecular and Nano Probes, Ministry of Education, College of Chemistry, Chemical Engineering and Materials Science, Shandong Normal University, Jinan 250014, China

<sup>2</sup> Key Laboratory of Organic Optoelectronics and Molecular Engineering of the Ministry of Education, Department of Chemistry, Tsinghua University, Beijing 100084, China

\* Correspondence: gqzhang@sdnu.edu.cn (G.Z.); sunnan@sdnu.edu.cn (N.S.)

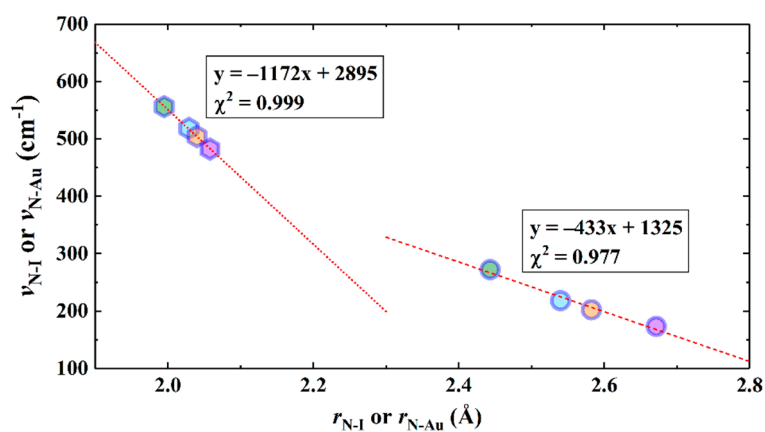

**Figure S1.** Correlation plots for bond length and bond frequency in  $\text{NH}_3\text{IY}$  and  $\text{NH}_3\text{AuY}$  series. The symbols hexagon and circle represent the I and Au atoms, respectively. The green, cyan, orange, and purple centers represent that the atom Y is F, Cl, Br, and I, respectively.

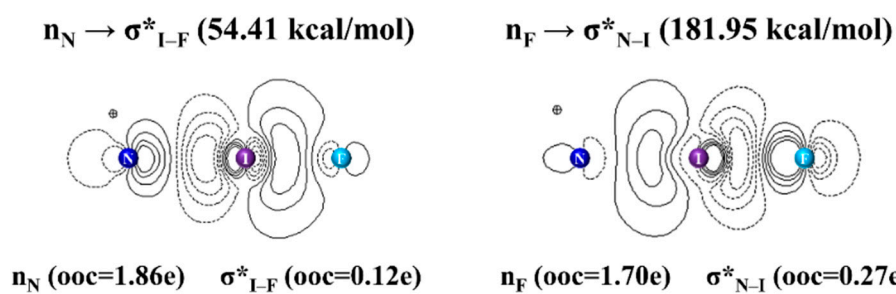

**Figure S2.** NBO orbital contour diagrams for  $n_{\text{N}} \rightarrow \sigma_{\text{I-F}}^*$  and  $n_{\text{F}} \rightarrow \sigma_{\text{N-I}}^*$  in  $\text{NH}_3\text{IF}$  complex.

**Table S1.** Calculated vibrational frequencies at the MP2/aug-cc-pVTZ (-PP) computational level.

| B<br>XY | NH3                             |                                 | H2O                             |                                 | Free                            |
|---------|---------------------------------|---------------------------------|---------------------------------|---------------------------------|---------------------------------|
|         | $\nu_{N-X}$ (cm <sup>-1</sup> ) | $\nu_{X-Y}$ (cm <sup>-1</sup> ) | $\nu_{O-X}$ (cm <sup>-1</sup> ) | $\nu_{X-Y}$ (cm <sup>-1</sup> ) | $\nu_{X-Y}$ (cm <sup>-1</sup> ) |
| FF      | 96                              | 932                             | 88                              | 983                             | 1004 (917) [1]                  |
| ClF     | 239                             | 626                             | 153                             | 757                             | 800 (786) [1]                   |
| ClCl    | 137                             | 505                             | 110                             | 559                             | 574 (560) [1]                   |
| BrF     | 267                             | 576                             | 178                             | 653                             | 693 (671) [2]                   |
| BrCl    | 187                             | 393                             | 134                             | 443                             | 461 (444) [2]                   |
| BrBr    | 168                             | 294                             | 122                             | 331                             | 341 (325) [2]                   |
| IF      | 272                             | 558                             | 187                             | 604                             | 634                             |
| ICl     | 218                             | 353                             | 150                             | 388                             | 406                             |
| IBr     | 202                             | 250                             | 139                             | 275                             | 286                             |
| II      | 173                             | 205                             | 125                             | 225                             | 230                             |
| AuF     | 556                             | 622                             | 466                             | 638                             | 584                             |
| AuCl    | 518                             | 412                             | 436                             | 413                             | 408                             |
| AuBr    | 504                             | 285                             | 411                             | 292                             | 287                             |
| AuI     | 482                             | 229                             | 382                             | 236                             | 236                             |

The values in brackets are available experimental data. The values for BAuY series from Ref. [3] are introduced to compare the halogen bonds with the coinage-metal bonds.

**Table S2.** Calculated dissociation energies at the MP2/aug-cc-pVTZ (-PP) computational level.

| B<br>XY | NH3                  |                      | H2O                  |                      | Free                 |
|---------|----------------------|----------------------|----------------------|----------------------|----------------------|
|         | $E_{N-X}$ (kcal/mol) | $E_{X-Y}$ (kcal/mol) | $E_{O-X}$ (kcal/mol) | $E_{X-Y}$ (kcal/mol) | $E_{X-Y}$ (kcal/mol) |
| FF      | 2.03                 | 33.04                | 1.43                 | 41.68                | 41.85                |
| ClF     | 11.82                | 66.10                | 5.60                 | 66.90                | 64.25                |
| ClCl    | 5.48                 | 53.50                | 3.16                 | 58.20                | 57.99                |
| BrF     | 16.78                | 74.73                | 8.37                 | 72.33                | 67.58                |
| BrCl    | 10.08                | 56.57                | 5.29                 | 57.80                | 56.13                |
| BrBr    | 8.60                 | 52.37                | 4.63                 | 54.41                | 53.40                |
| IF      | 19.79                | 84.86                | 10.60                | 80.27                | 73.45                |
| ICl     | 14.28                | 61.91                | 7.58                 | 59.81                | 56.01                |
| IBr     | 12.75                | 56.16                | 6.80                 | 54.82                | 51.80                |
| II      | 10.13                | 49.58                | 5.55                 | 49.61                | 47.84                |
| AuF     | 64.30                | 120.33               | 39.74                | 108.18               | 99.86                |
| AuCl    | 56.23                | 109.74               | 33.71                | 99.63                | 99.01                |
| AuBr    | 53.47                | 104.43               | 31.54                | 94.92                | 95.94                |
| AuI     | 48.48                | 96.36                | 27.75                | 88.04                | 91.77                |

The values for BAuY series from Ref. [3] are introduced to compare the halogen bonds with the coinage-metal bonds.

**Table S3.** Calculated equilibrium bond lengths at the CCSD/def2-TZVPPD computational level.

| B<br>XY | NH <sub>3</sub>   |                   | H <sub>2</sub> O  |                   | Free              |
|---------|-------------------|-------------------|-------------------|-------------------|-------------------|
|         | $r_{N-X}$ (Å)     | $r_{X-Y}$ (Å)     | $r_{O-X}$ (Å)     | $r_{X-Y}$ (Å)     | $r_{X-Y}$ (Å)     |
| FF      | 2.821 (2.71) [4]  | 1.402 (1.43) [1]  | 2.795 (2.70) [5]  | 1.399             | 1.395 (1.41) [1]  |
| ClF     | 2.402 (2.37) [6]  | 1.666 (1.70) [1]  | 2.631 (2.54) [7]  | 1.638             | 1.626 (1.63) [1]  |
| ClCl    | 2.795 (2.73) [8]  | 2.015 (2.00) [8]  | 2.899 (2.81) [9]  | 2.004 (2.01) [10] | 1.999 (1.99) [1]  |
| BrF     | 2.400 (2.34) [2]  | 1.802 (1.71) [2]  | 2.612             | 1.768             | 1.754 (1.76) [2]  |
| BrCl    | 2.656 (2.63) [11] | 2.178 (2.19) [11] | 2.829 (2.74) [12] | 2.154 (2.15) [10] | 2.144 (2.14) [2]  |
| BrBr    | 2.735 (2.72) [13] | 2.317 (2.34) [13] | 2.894 (2.80) [14] | 2.297 (2.29) [10] | 2.289 (2.28) [2]  |
| IF      | 2.512             | 1.949             | 2.673             | 1.920             | 1.902             |
| ICl     | 2.652 (2.54) [10] | 2.371 (2.39) [10] | 2.829 (2.78) [15] | 2.338 (2.34) [10] | 2.322 (2.32) [10] |
| IBr     | 2.704 (2.58) [10] | 2.519 (2.53) [10] | 2.884 (2.78) [10] | 2.487 (2.48) [10] | 2.474 (2.47) [10] |
| II      | 2.829 (2.67) [10] | 2.702 (2.72) [10] | 2.987 (2.87) [10] | 2.678 (2.68) [10] | 2.668 (2.66) [10] |
| AuF     | 2.037             | 1.927             | 2.082             | 1.916             | 1.935 (1.92) [16] |
| AuCl    | 2.077             | 2.237             | 2.131             | 2.220             | 2.229 (2.20) [16] |
| AuBr    | 2.089             | 2.356             | 2.149             | 2.339             | 2.345 (2.32) [16] |
| AuI     | 2.108             | 2.513             | 2.181             | 2.493             | 2.496 (2.47) [17] |

The values in brackets are available experimental or calculated data. The values for BAuY series from Ref. [3] are introduced to compare the halogen bonds with the coinage-metal bonds. The calculated comparisons from Ref. [10] at the MP2/aug-cc-pVTZ (-PP) level. The calculated comparisons from Ref. [2] at the CCSD(T)/aug-cc-pVTZ (-PP) level.

**Table S4.** Calculated vibrational frequencies of at the CCSD/def2-TZVPPD computational level.

| B<br>XY | NH <sub>3</sub>                 |                                 | H <sub>2</sub> O                |                                 | Free                            |
|---------|---------------------------------|---------------------------------|---------------------------------|---------------------------------|---------------------------------|
|         | $\nu_{N-X}$ (cm <sup>-1</sup> ) | $\nu_{X-Y}$ (cm <sup>-1</sup> ) | $\nu_{O-X}$ (cm <sup>-1</sup> ) | $\nu_{X-Y}$ (cm <sup>-1</sup> ) | $\nu_{X-Y}$ (cm <sup>-1</sup> ) |
| FF      | 79                              | 982                             | 74                              | 997                             | 1008 (917) [1]                  |
| ClF     | 177                             | 709                             | 131                             | 785                             | 808 (786) [1]                   |
| ClCl    | 112                             | 535                             | 97                              | 559                             | 565 (560) [1]                   |
| BrF     | 210                             | 616                             | 149                             | 676                             | 699 (671) [2]                   |
| BrCl    | 145                             | 414                             | 111                             | 443                             | 452 (444) [2]                   |
| BrBr    | 131                             | 306                             | 99                              | 326                             | 331 (325) [2]                   |
| IF      | 230                             | 571                             | 162                             | 614                             | 637                             |
| ICl     | 178                             | 359                             | 131                             | 385                             | 396                             |
| IBr     | 164                             | 251                             | 121                             | 270                             | 276                             |
| II      | 139                             | 207                             | 104                             | 220                             | 223                             |
| AuF     | 506                             | 601                             | 416                             | 609                             | 557                             |
| AuCl    | 469                             | 383                             | 404                             | 364                             | 375                             |
| AuBr    | 456                             | 263                             | 363                             | 266                             | 261                             |
| AuI     | 435                             | 208                             | 334                             | 212                             | 210                             |

The values in brackets are available experimental data. The values for BAuY series from Ref. [3] are introduced to compare the halogen bonds with the coinage-metal bonds.

**Table S5.** Calculated dissociation energies at the CCSD/def2-TZVPPD computational level.

| B<br>XY | NH <sub>3</sub>      |                      | H <sub>2</sub> O     |                      | Free                 |
|---------|----------------------|----------------------|----------------------|----------------------|----------------------|
|         | $E_{N-X}$ (kcal/mol) | $E_{X-Y}$ (kcal/mol) | $E_{O-X}$ (kcal/mol) | $E_{X-Y}$ (kcal/mol) | $E_{X-Y}$ (kcal/mol) |
| FF      | 1.45                 | 19.93                | 1.10                 | 27.43                | 28.27                |
| ClF     | 8.29                 | 53.44                | 4.44                 | 54.85                | 52.89                |
| ClCl    | 4.02                 | 45.99                | 2.62                 | 49.84                | 49.71                |
| BrF     | 12.38                | 60.00                | 6.44                 | 58.43                | 54.82                |
| BrCl    | 7.07                 | 47.27                | 4.09                 | 48.66                | 47.41                |
| BrBr    | 5.88                 | 43.17                | 3.47                 | 45.15                | 44.51                |
| IF      | 15.51                | 69.75                | 8.37                 | 65.93                | 60.56                |
| ICl     | 10.82                | 51.61                | 6.02                 | 50.13                | 47.10                |
| IBr     | 9.46                 | 45.95                | 5.32                 | 45.12                | 42.79                |
| II      | 7.15                 | 39.73                | 4.20                 | 40.10                | 38.89                |
| AuF     | 53.59                | 104.86               | 32.04                | 92.03                | 99.86                |
| AuCl    | 46.41                | 96.81                | 26.84                | 85.97                | 99.01                |
| AuBr    | 43.68                | 91.02                | 24.77                | 80.83                | 95.94                |
| AuI     | 39.42                | 82.59                | 21.67                | 73.57                | 91.77                |

The values for BAuY series from Ref. [3] are introduced to compare the halogen bonds with the coinage-metal bonds.

**Table S6.** Second-order perturbation stabilization energy  $\Delta E^{(2)}_{D \rightarrow A}$  (kcal/mol) due to the donor-acceptor interactions  $n_B \rightarrow \sigma^*_{X-Y}$  ( $\Delta E^{(2)}_1$ ) or  $n_Y \rightarrow \sigma^*_{B-X}$  ( $\Delta E^{(2)}_2$ ) in all studied BXY complexes, calculated at the MP2/aug-cc-pVTZ (-PP) computational level.

| B<br>XY | NH <sub>3</sub>    |                    | H <sub>2</sub> O   |                    |
|---------|--------------------|--------------------|--------------------|--------------------|
|         | $\Delta E^{(2)}_1$ | $\Delta E^{(2)}_2$ | $\Delta E^{(2)}_1$ | $\Delta E^{(2)}_2$ |
| FF      | 2.87               | 4741.37            | 0.74               | 2116.07            |
| ClF     | 52.95              | 352.28             | 10.44              | 522.16             |
| ClCl    | 13.92              | 2504.61            | 3.64               | 3721.83            |
| BrF     | 62.17              | 260.92             | 17.98              | 360.82             |
| BrCl    | 34.19              | 688.14             | 8.48               | 1183.52            |
| BrBr    | 26.85              | 1226.02            | 6.76               | 3052.30            |
| IF      | 54.41              | 181.95             | 21.61              | 233.05             |
| ICl     | 42.31              | 343.05             | 13.58              | 511.91             |
| IBr     | 37.24              | 446.94             | 11.36              | 749.35             |
| II      | 27.34              | 850.88             | 8.13               | 2130.48            |
| AuF     | 173.04             | 178.43             | 92.75              | 167.20             |
| AuCl    | 179.30             | 323.77             | 93.01              | 301.19             |
| AuBr    | 174.54             | 358.83             | 90.02              | 343.01             |
| AuI     | 159.11             | 433.76             | 80.46              | 412.41             |

The values for BAuY series from Ref. [3] are introduced to compare the halogen bonds with the coinage-metal bonds.

**Table S7.** Orbital occupancies (e) of lone pair orbital  $n_B$  and antibonding orbital  $\sigma^*_{X-Y}$  arising from the hyperconjugation  $n_B \rightarrow \sigma^*_{X-Y}$ , as well as those of  $n_Y$  and  $\sigma^*_{B-X}$  arising from  $n_Y \rightarrow \sigma^*_{B-X}$ , calculated at the MP2/aug-cc-pVTZ (-PP) computational level.

| XY \ B | NH <sub>3</sub> |                  |       |                  | H <sub>2</sub> O |                  |       |                  |
|--------|-----------------|------------------|-------|------------------|------------------|------------------|-------|------------------|
|        | $n_N$           | $\sigma^*_{X-Y}$ | $n_Y$ | $\sigma^*_{N-X}$ | $n_O$            | $\sigma^*_{X-Y}$ | $n_Y$ | $\sigma^*_{O-X}$ |
| FF     | 1.99            | 0.01             | 1.04  | 0.93             | 2.00             | 0.00             | 1.03  | 0.88             |
| ClF    | 1.85            | 0.13             | 1.52  | 0.42             | 1.97             | 0.02             | 1.44  | 0.50             |
| ClCl   | 1.95            | 0.04             | 1.09  | 0.85             | 1.99             | 0.01             | 1.04  | 0.89             |
| BrF    | 1.84            | 0.14             | 1.61  | 0.34             | 1.96             | 0.04             | 1.54  | 0.41             |
| BrCl   | 1.90            | 0.09             | 1.27  | 0.67             | 1.98             | 0.02             | 1.18  | 0.77             |
| BrBr   | 1.92            | 0.07             | 1.14  | 0.80             | 1.98             | 0.02             | 1.06  | 0.89             |
| IF     | 1.86            | 0.12             | 1.70  | 0.27             | 1.95             | 0.04             | 1.65  | 0.31             |
| ICl    | 1.88            | 0.10             | 1.43  | 0.52             | 1.97             | 0.03             | 1.35  | 0.60             |
| IBr    | 1.89            | 0.10             | 1.33  | 0.62             | 1.97             | 0.03             | 1.24  | 0.72             |
| II     | 1.91            | 0.08             | 1.17  | 0.78             | 1.98             | 0.02             | 1.08  | 0.88             |
| AuF    | 1.80            | 0.19             | 1.79  | 0.20             | 1.88             | 0.11             | 1.78  | 0.21             |
| AuCl   | 1.82            | 0.18             | 1.67  | 0.31             | 1.90             | 0.10             | 1.65  | 0.33             |
| AuBr   | 1.82            | 0.17             | 1.64  | 0.34             | 1.90             | 0.09             | 1.62  | 0.36             |
| AuI    | 1.83            | 0.16             | 1.59  | 0.39             | 1.91             | 0.09             | 1.56  | 0.42             |

The values for BAuY series from Ref. [3] are introduced to compare the halogen bonds with the coinage-metal bonds.

**Table S8.** Calculated total density  $\rho(r)$  and Laplacian  $\nabla^2\rho(r)$  at the BCPs of B-X and X-Y bonds at the MP2/aug-cc-pVTZ (-PP) computational level. All values are in a.u.

| XY \ B | NH <sub>3</sub> |                         |                 |                         | H <sub>2</sub> O |                         |                 |                         | Free            |                         |
|--------|-----------------|-------------------------|-----------------|-------------------------|------------------|-------------------------|-----------------|-------------------------|-----------------|-------------------------|
|        | $\rho(r)_{N-X}$ | $\nabla^2\rho(r)_{N-X}$ | $\rho(r)_{X-Y}$ | $\nabla^2\rho(r)_{X-Y}$ | $\rho(r)_{O-X}$  | $\nabla^2\rho(r)_{O-X}$ | $\rho(r)_{X-Y}$ | $\nabla^2\rho(r)_{X-Y}$ | $\rho(r)_{X-Y}$ | $\nabla^2\rho(r)_{X-Y}$ |
| FF     | 0.015           | 0.077                   | 0.278           | 0.529                   | 0.010            | 0.058                   | 0.285           | 0.522                   | 0.290           | 0.520                   |
| ClF    | 0.065           | 0.140                   | 0.179           | 0.010                   | 0.027            | 0.115                   | 0.204           | -0.136                  | 0.212           | -0.185                  |
| ClCl   | 0.030           | 0.096                   | 0.148           | -0.010                  | 0.016            | 0.069                   | 0.156           | -0.033                  | 0.158           | -0.039                  |
| BrF    | 0.064           | 0.123                   | 0.146           | 0.187                   | 0.034            | 0.123                   | 0.161           | 0.204                   | 0.170           | 0.209                   |
| BrCl   | 0.045           | 0.111                   | 0.116           | 0.019                   | 0.022            | 0.086                   | 0.128           | -0.009                  | 0.132           | -0.018                  |
| BrBr   | 0.040           | 0.103                   | 0.103           | 0.013                   | 0.020            | 0.077                   | 0.111           | -0.006                  | 0.113           | -0.010                  |
| IF     | 0.055           | 0.112                   | 0.119           | 0.358                   | 0.034            | 0.112                   | 0.127           | 0.399                   | 0.133           | 0.421                   |
| ICl    | 0.047           | 0.100                   | 0.092           | 0.055                   | 0.026            | 0.088                   | 0.100           | 0.046                   | 0.105           | 0.039                   |
| IBr    | 0.043           | 0.096                   | 0.083           | 0.026                   | 0.023            | 0.081                   | 0.090           | 0.014                   | 0.093           | 0.008                   |
| II     | 0.037           | 0.087                   | 0.072           | 0.010                   | 0.020            | 0.070                   | 0.077           | 0.001                   | 0.078           | -0.001                  |
| AuF    | 0.138           | 0.465                   | 0.143           | 0.719                   | 0.107            | 0.537                   | 0.151           | 0.727                   | 0.150           | 0.719                   |
| AuCl   | 0.128           | 0.438                   | 0.128           | 0.259                   | 0.098            | 0.490                   | 0.135           | 0.248                   | 0.135           | 0.256                   |
| AuBr   | 0.125           | 0.429                   | 0.117           | 0.160                   | 0.095            | 0.473                   | 0.123           | 0.146                   | 0.121           | 0.156                   |
| AuI    | 0.120           | 0.414                   | 0.104           | 0.067                   | 0.089            | 0.443                   | 0.108           | 0.059                   | 0.105           | 0.076                   |

The values for BAuY series from Ref. [3] are introduced to compare the halogen bonds with the coinage-metal bonds.

**Table S9.** Calculated equilibrium bond lengths (Å) for free XY species at the B3LYP, MP2, CCSD, and CCSD(T) levels in combination with different basis sets. The relative mean deviations (RMDs) were calculated with respect to the corresponding available experimental values (Exp.).

| Free<br>XY | aug-cc-pVTZ |       |         | def2-TZVPPD | aug-cc-pVQZ | Exp.       |
|------------|-------------|-------|---------|-------------|-------------|------------|
|            | B3LYP       | MP2   | CCSD(T) | CCSD        | CCSD(T)     |            |
| FF         | 1.397       | 1.401 | 1.418   | 1.395       | 1.413       | 1.412 [1]  |
| ClF        | 1.649       | 1.638 | 1.647   | 1.626       | 1.637       | 1.628 [1]  |
| ClCl       | 2.024       | 1.999 | 2.020   | 1.999       | 2.003       | 1.988 [1]  |
| BrF        | 1.775       | 1.758 | 1.765   | 1.754       | 1.756       | 1.759 [2]  |
| BrCl       | 2.170       | 2.138 | 2.160   | 2.144       | 2.143       | 2.136 [2]  |
| BrBr       | 2.316       | 2.279 | 2.302   | 2.289       | 2.283       | 2.281 [2]  |
| IF         | 1.937       | 1.920 | 1.924   | 1.902       | 1.906       |            |
| ICl        | 2.357       | 2.321 | 2.342   | 2.322       | 2.326       |            |
| IBr        | 2.505       | 2.465 | 2.491   | 2.474       | 2.470       |            |
| II         | 2.703       | 2.663 | 2.692   | 2.668       | 2.664       |            |
| AuF        | 1.951       | 1.902 | 1.930   | 1.935       | 1.927       | 1.918 [16] |
| AuCl       | 2.248       | 2.174 | 2.220   | 2.229       | 2.212       | 2.199 [16] |
| AuBr       | 2.370       | 2.284 | 2.333   | 2.345       | 2.325       | 2.318 [16] |
| AuI        | 2.532       | 2.436 | 2.486   | 2.496       | 2.473       | 2.471 [17] |
| RMD        | 1.69%       | 0.70% | 0.85%   | 0.72%       | 0.34%       |            |

**Table S10.** Calculated vibrational frequencies ( $\text{cm}^{-1}$ ) for free XY species at the B3LYP, MP2, CCSD, and CCSD(T) levels in combination with different basis sets. The relative mean deviations (RMDs) were calculated with respect to the corresponding available experimental values (Exp.).

| Free<br>XY | aug-cc-pVTZ |       |         | def2-TZVPPD | aug-cc-pVQZ | Exp.    |
|------------|-------------|-------|---------|-------------|-------------|---------|
|            | B3LYP       | MP2   | CCSD(T) | CCSD        | CCSD(T)     |         |
| FF         | 1051        | 1004  | 916     | 1008        | 922         | 917 [1] |
| ClF        | 787         | 800   | 771     | 808         | 783         | 786 [1] |
| ClCl       | 537         | 574   | 541     | 565         | 553         | 560 [1] |
| BrF        | 675         | 693   | 673     | 699         | 679         | 671 [2] |
| BrCl       | 430         | 461   | 435     | 452         | 447         | 444 [2] |
| BrBr       | 316         | 341   | 322     | 331         | 331         | 325 [2] |
| IF         | 612         | 634   | 622     | 637         | 633         |         |
| ICl        | 383         | 406   | 385     | 396         | 392         |         |
| IBr        | 263         | 286   | 369     | 276         | 277         |         |
| II         | 213         | 230   | 216     | 223         | 224         |         |
| AuF        | 529         | 584   | 554     | 557         | 557         |         |
| AuCl       | 345         | 408   | 377     | 375         | 379         |         |
| AuBr       | 243         | 287   | 263     | 261         | 267         |         |
| AuI        | 196         | 236   | 215     | 210         | 217         |         |
| RMD        | 4.23%       | 4.28% | 1.42%   | 3.59%       | 0.98%       |         |

**Table S11.** Calculated dissociation energies (kcal/mol) for free XY species at the B3LYP, MP2, CCSD, and CCSD(T) levels in combination with different basis sets. The relative mean deviations (*RMDs*) were calculated with respect to the corresponding values at the CCSD(T)/aug-cc-pVQZ (-PP) level.

| Free XY        | aug-cc-pVTZ |        |         | def2-TZVPPD | aug-cc-pVQZ |
|----------------|-------------|--------|---------|-------------|-------------|
|                | B3LYP       | MP2    | CCSD(T) | CCSD        | CCSD(T)     |
| FF             | 37.10       | 41.85  | 29.26   | 28.27       | 30.19       |
| ClF            | 59.48       | 64.25  | 53.10   | 52.89       | 55.38       |
| ClCl           | 54.02       | 57.99  | 49.26   | 49.71       | 52.10       |
| BrF            | 61.99       | 67.58  | 56.55   | 54.82       | 58.46       |
| BrCl           | 51.92       | 56.13  | 47.95   | 47.41       | 50.75       |
| BrBr           | 48.90       | 53.40  | 45.83   | 44.51       | 48.46       |
| IF             | 67.47       | 73.45  | 62.55   | 60.56       | 65.07       |
| ICl            | 51.74       | 56.01  | 48.02   | 47.10       | 50.84       |
| IBr            | 47.11       | 51.80  | 44.38   | 42.79       | 47.18       |
| I <sub>2</sub> | 43.06       | 47.84  | 40.49   | 38.89       | 43.83       |
| AuF            | 67.05       | 110.32 | 100.27  | 99.86       | 102.29      |
| AuCl           | 62.49       | 107.80 | 98.81   | 99.01       | 101.80      |
| AuBr           | 58.71       | 105.25 | 96.55   | 95.94       | 99.77       |
| AuI            | 54.22       | 102.17 | 92.86   | 91.77       | 96.30       |
| <i>RMD</i>     | 14.89%      | 12.12% | 4.40%   | 6.06%       |             |



## References

1. Karpfen, A., Charge-Transfer Complexes Between  $\text{NH}_3$  and the Halogens  $\text{F}_2$ ,  $\text{ClF}$ , and  $\text{Cl}_2$ : An *ab initio* Study on the Intermolecular Interaction. *Journal of Physical Chemistry A* **2000**, 104 (29), 6871-6879.
2. Metrangolo, P.; Resnati, G., Halogen Bonding: Fundamentals and Applications. In *Structure and Bonding*, 2008; Vol. 126, pp 1-221.
3. Song, J.; Fu, L.; Li, H.; Su, Y.; Wang, Q.; Zhang, G.; Wang, J., Equivalent and Complement of the Omega-Bonding Model and Charge-Shift Bonding Model: A Natural Bond Orbital/Natural Resonance Theory/Atoms in Molecules Investigation via Cu/Ag/Au Bonding in BMX (B =  $\text{H}_2\text{O}$ ,  $\text{H}_2\text{S}$ ,  $\text{NH}_3$ , and  $\text{PH}_3$ ; M = Cu, Ag, and Au; and X = F, Cl, Br, and I). *Journal of Physical Chemistry Letters* **2023**, 14 (23), 5226-5233.
4. Bloemink, H. I.; Hinds, K.; Holloway, J. H.; Legon, A. C., Characterisation of A Pre-Reactive Intermediate in Gas-Phase Mixtures of Fluorine and Ammonia: The Rotational Spectrum of the  $\text{H}_3\text{N}\cdots\text{F}_2$  Complex. *Chemical Physics Letters* **1995**, 245 (6), 598-604.
5. Cooke, S. A.; Cotti, G.; Holloway, J. H.; Legon, A. C., Detection and Characterization of A Pre-Reactive Complex in A Mixture of Water and Fluorine: Rotational Spectrum of  $\text{H}_2\text{O}\cdots\text{F}_2$ . *Angewandte Chemie-International Edition* **1997**, 36 (1-2), 129-130.
6. Bloemink, H. I.; Evans, C. M.; Holloway, J. H.; Legon, A. C., Is the Gas-Phase Complex of Ammonia and Chlorine Monofluoride  $\text{H}_3\text{N}\cdots\text{ClF}$  or  $[\text{H}_3\text{NCl}]^+\cdots\text{F}^-$ ? Evidence from Rotational Spectroscopy. *Chemical Physics Letters* **1996**, 248 (3), 260-268.
7. Davey, J. B.; Legon, A. C.; Thumwood, J. M. A., Interaction of Water and Dichlorine in the Gas Phase: An Investigation of  $\text{H}_2\text{O}\cdots\text{Cl}_2$  by Rotational Spectroscopy and *ab initio* Calculations. *Journal of Chemical Physics* **2001**, 114 (14), 6190-6202.
8. Legon, A. C.; Lister, D. G.; Thorn, J. C., Nonreactive Interaction of Ammonia and Molecular Chlorine - Rotational Spectrum of the Charge-Transfer Complex  $\text{H}_3\text{N}\cdots\text{Cl}_2$ . *Journal of the Chemical Society-Faraday Transactions* **1994**, 90 (21), 3205-3212.
9. Legon, A. C.; Thumwood, J. M. A.; Wacławik, E. R., The Interaction of Water and Dibromine in the Gas Phase: An Investigation of the Complex  $\text{H}_2\text{O}\cdots\text{Br}_2$  by Rotational Spectroscopy and *ab initio* Calculations. *Chemistry-a European Journal* **2002**, 8 (4), 940-950.
10. Alkorta, I.; Legon, A. C., Systematic Behaviour of Electron Redistribution on Formation of Halogen-Bonded Complexes BXY, as Determined via XY Halogen Nuclear Quadrupole Coupling Constants. *Physical Chemistry Chemical Physics* **2019**, 21 (31), 16914-16922.
11. Bloemink, H. I.; Legon, A. C.; Thorn, J., 'Charge-Transfer' Complexes of Ammonia with Halogens. Nature of the Binding in  $\text{H}_3\text{N}\cdots\text{BrCl}$  from Its Rotational Spectrum. *Journal of the Chemical Society-Faraday Transactions* **1995**, 91 (5), 781-787.
12. Cooke, S. A.; Cotti, G.; Evans, C. M.; Holloway, J. H.; Legon, A. C., The Pre-Reactive Complex  $\text{H}_2\text{O}\cdots\text{ClF}$  Identified in Mixtures of Water Vapour and Chlorine Monofluoride by Rotational Spectroscopy. *Chemical Communications* **1996**, (20), 2327-2328.
13. Bloemink, H. I.; Legon, A. C., The Complex  $\text{H}_3\text{N}\cdots\text{Br}_2$  Characterized in the Gas Phase by Rotational Spectroscopy. *Journal of Chemical Physics* **1995**, 103 (3), 876-882.
14. Davey, J. B.; Legon, A. C., Rotational Spectroscopy of the Gas Phase Complex of Water and Bromine Monochloride in the Microwave Region: Geometry, Binding Strength and Charge Transfer. *Physical Chemistry Chemical Physics* **2001**, 3 (15), 3006-3011.
15. Davey, J. B.; Legon, A. C.; Wacławik, E. R., An Investigation of the Gas-Phase Complex of Water and Iodine Monochloride by Microwave Spectroscopy: Geometry, Binding Strength and Electron Redistribution. *Physical Chemistry Chemical Physics* **2000**, 2 (8), 1659-1665.
16. Guichemerre, M.; Chambaud, G.; Stoll, H., Electronic Structure and Spectroscopy of Monohalides of Metals of Group I-B. *Chemical Physics* **2002**, 280 (1), 71-102.
17. Reynard, L. M.; Evans, C. J.; Gerry, M. C. L., The Pure Rotational Spectrum of  $\text{AuI}$ . *Journal of Molecular Spectroscopy* **2001**, 205 (2), 344-346.
